# Supplementary material
Source: publisher site journal article supplement (https://www.spandidos-publications.com/2467/downloadSupplementary)

Figure S1. Fluorescence intensity of apoptosis determined by TUNEL assay using confocal microscopy. The apoptosis in the co-knockdown cells was higher than in the single-knockdown cells. \*P<0.05 and \*\*P<0.01. Fold change was performed and one-way ANOVA followed by Tukey's post hoc test were performed to compare the difference between groups. TUNEL, terminal deoxynucleotidyl transferase-mediated dUTP nick-end labeling; BiP, binding immunoglobulin protein; cis, cisplatin; si, small interfering.

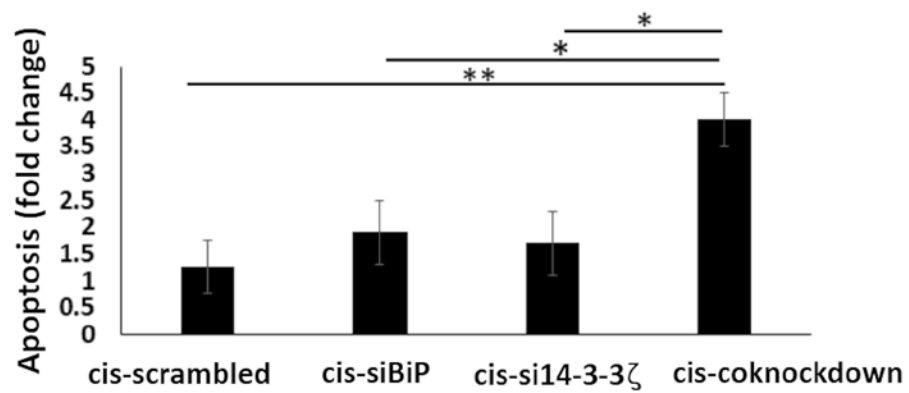

Figure S2. Fluorescence intensity of an autophagy assay using confocal microscopy. In the co-knockdown cells, autophagy significantly decreased in comparison to knockdown in either BiP or 14-3-3 $\zeta$ . \*P<0.05 and \*\*\*P<0.001. Fold change was performed and one-way ANOVA followed by Tukey's post hoc test were conducted to compare the difference between groups. BiP, binding immunoglobulin protein; cis, cisplatin; si, small interfering.

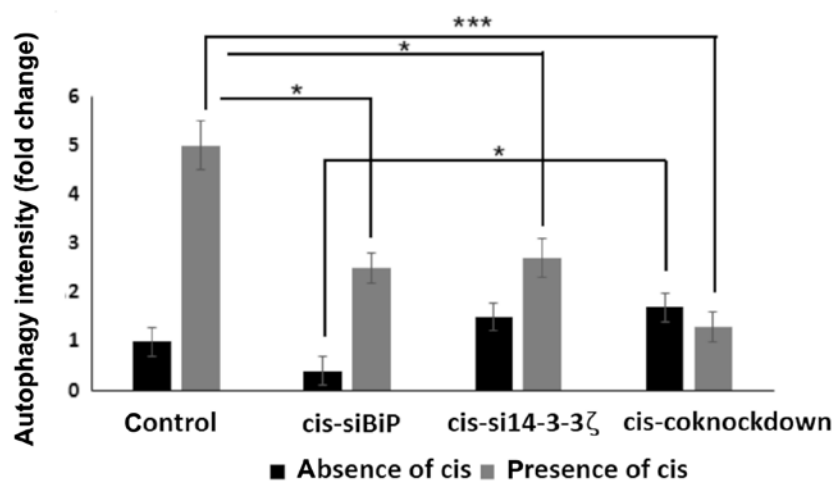

Supplement: Supplementary file 1 [file downloadSupplementary]
